# Supplementary material for: Comparative effectiveness of ChAdOx1 versus BNT162b2 COVID-19 vaccines in Health and Social Care workers in England: a cohort study using OpenSAFELY
Source: bioRxiv or medRxiv preprint supplement (doi:10.1101/2021.10.13.21264937), 2021-10-18
Supplement: Supplementary file [file media-1.pdf]

Comparative vaccine effectiveness of ChAdOx1 versus BNT162b2 in  
Health and Social Care workers in England: Supplementary  
materials

Figure S1a: Comparative effectiveness adjusting for region-specific calendar-time

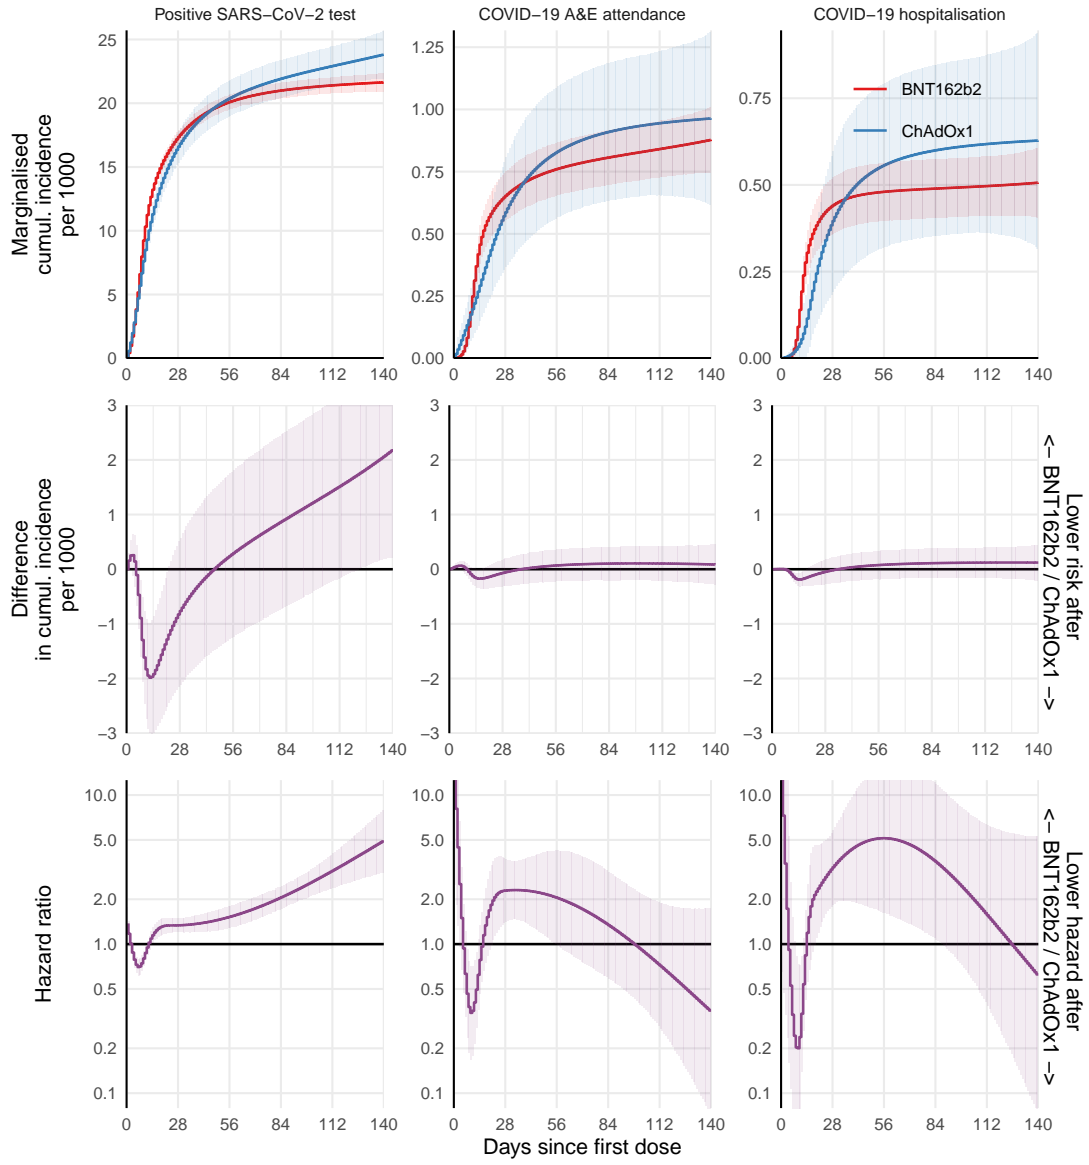

Figure S1b: Comparative effectiveness adjusting for region-specific calendar-time and demographic characteristics

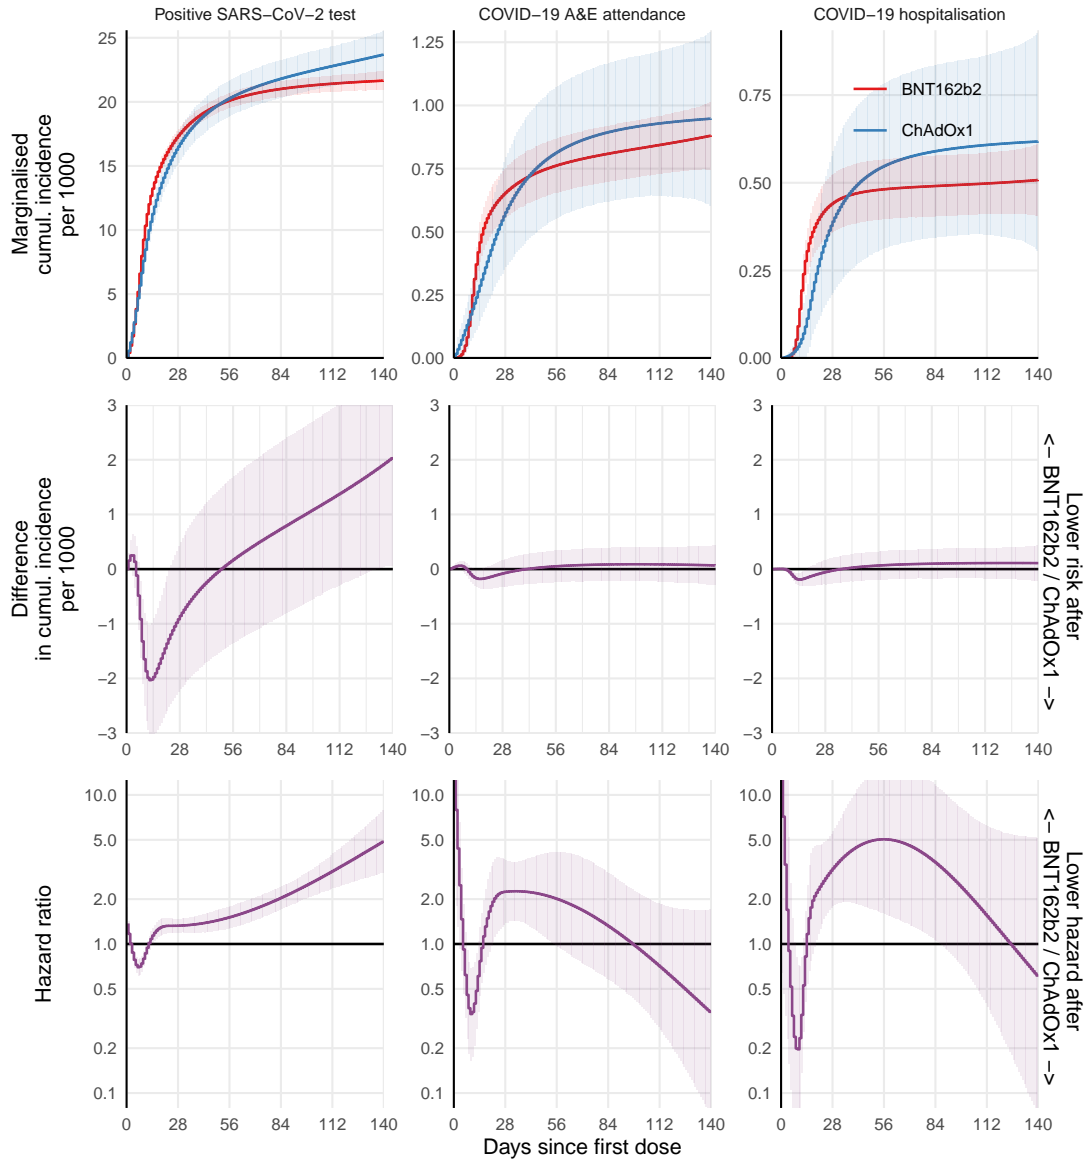

**Figure S2: Fully adjusted comparative effectiveness using piecewise-constant estimates of the hazard**

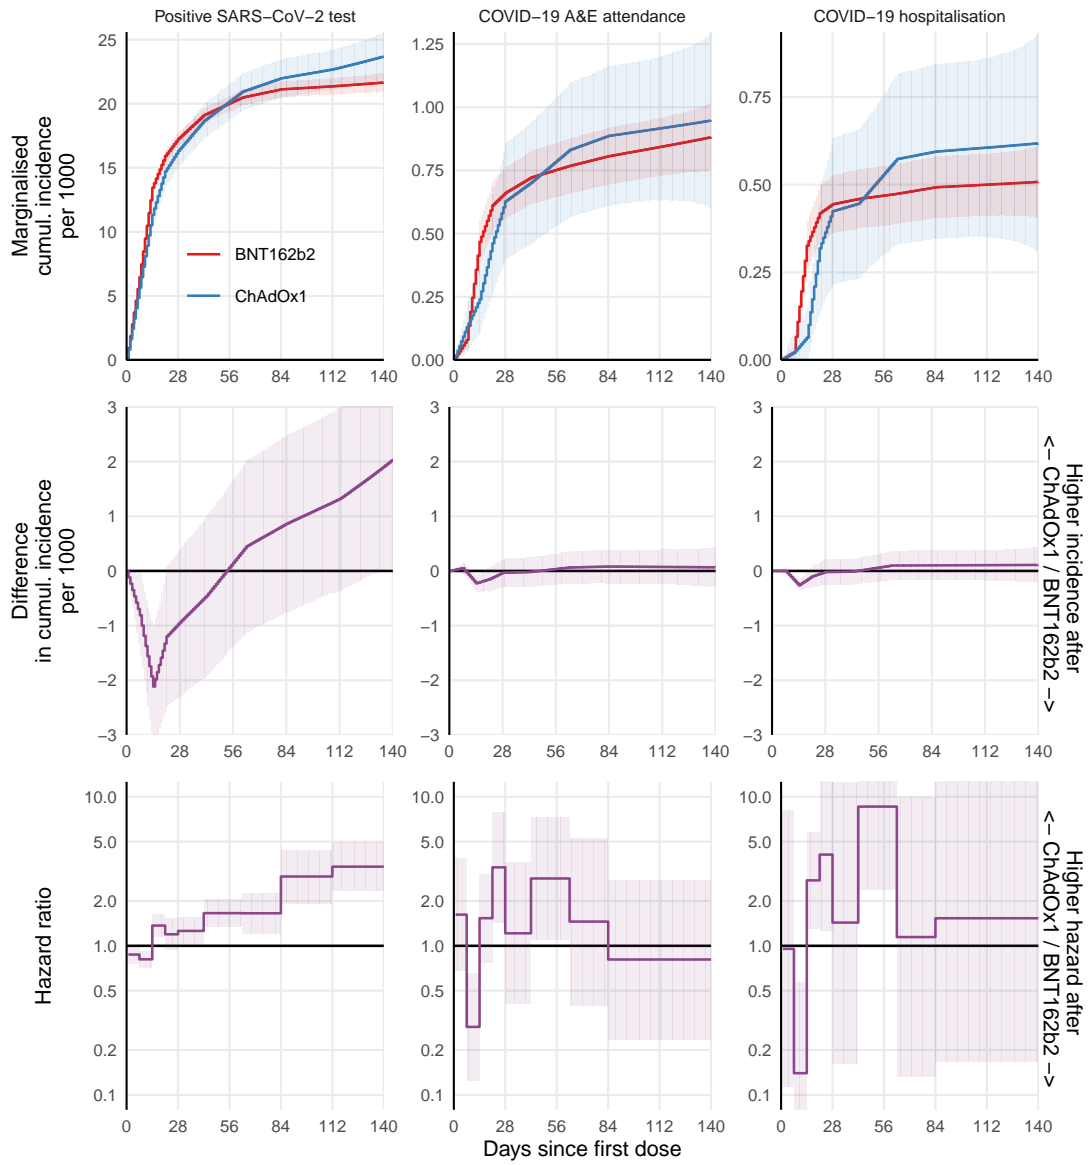

**Figure S3: Second dose interval**

Second dose events are censored by study end date, de-registration, death, and additionally by outcome-specific events.

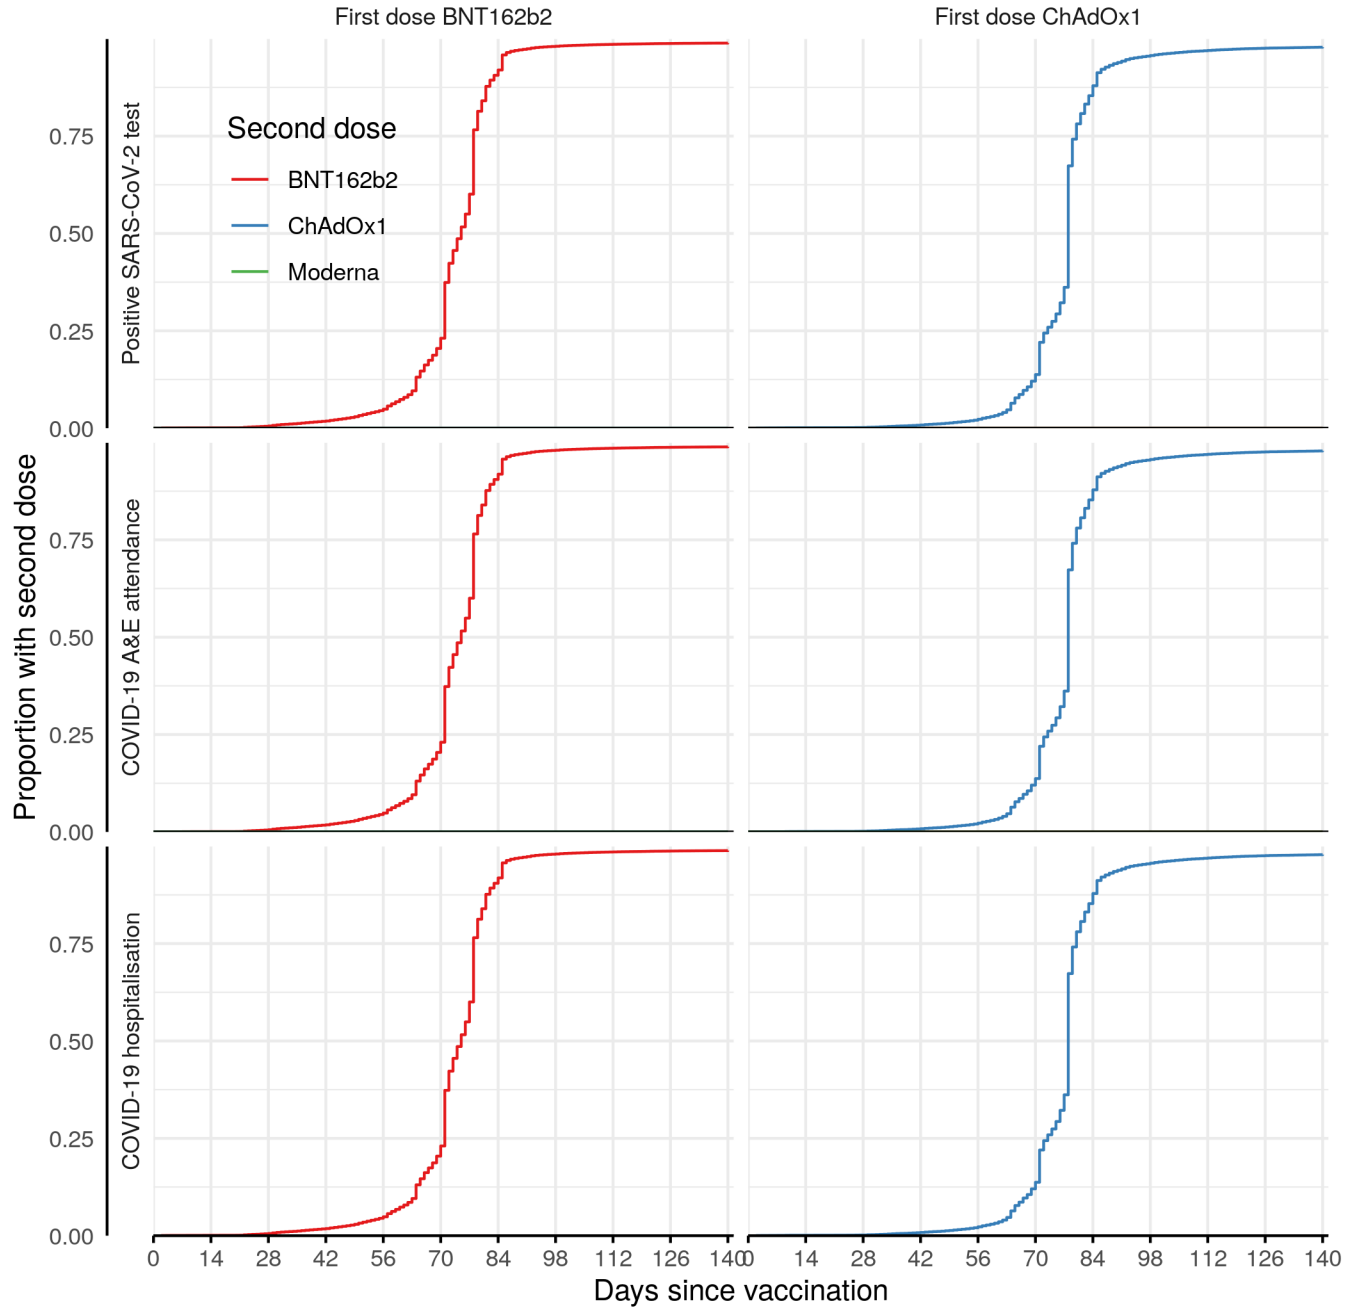

Figure S4: Event rates by calendar time

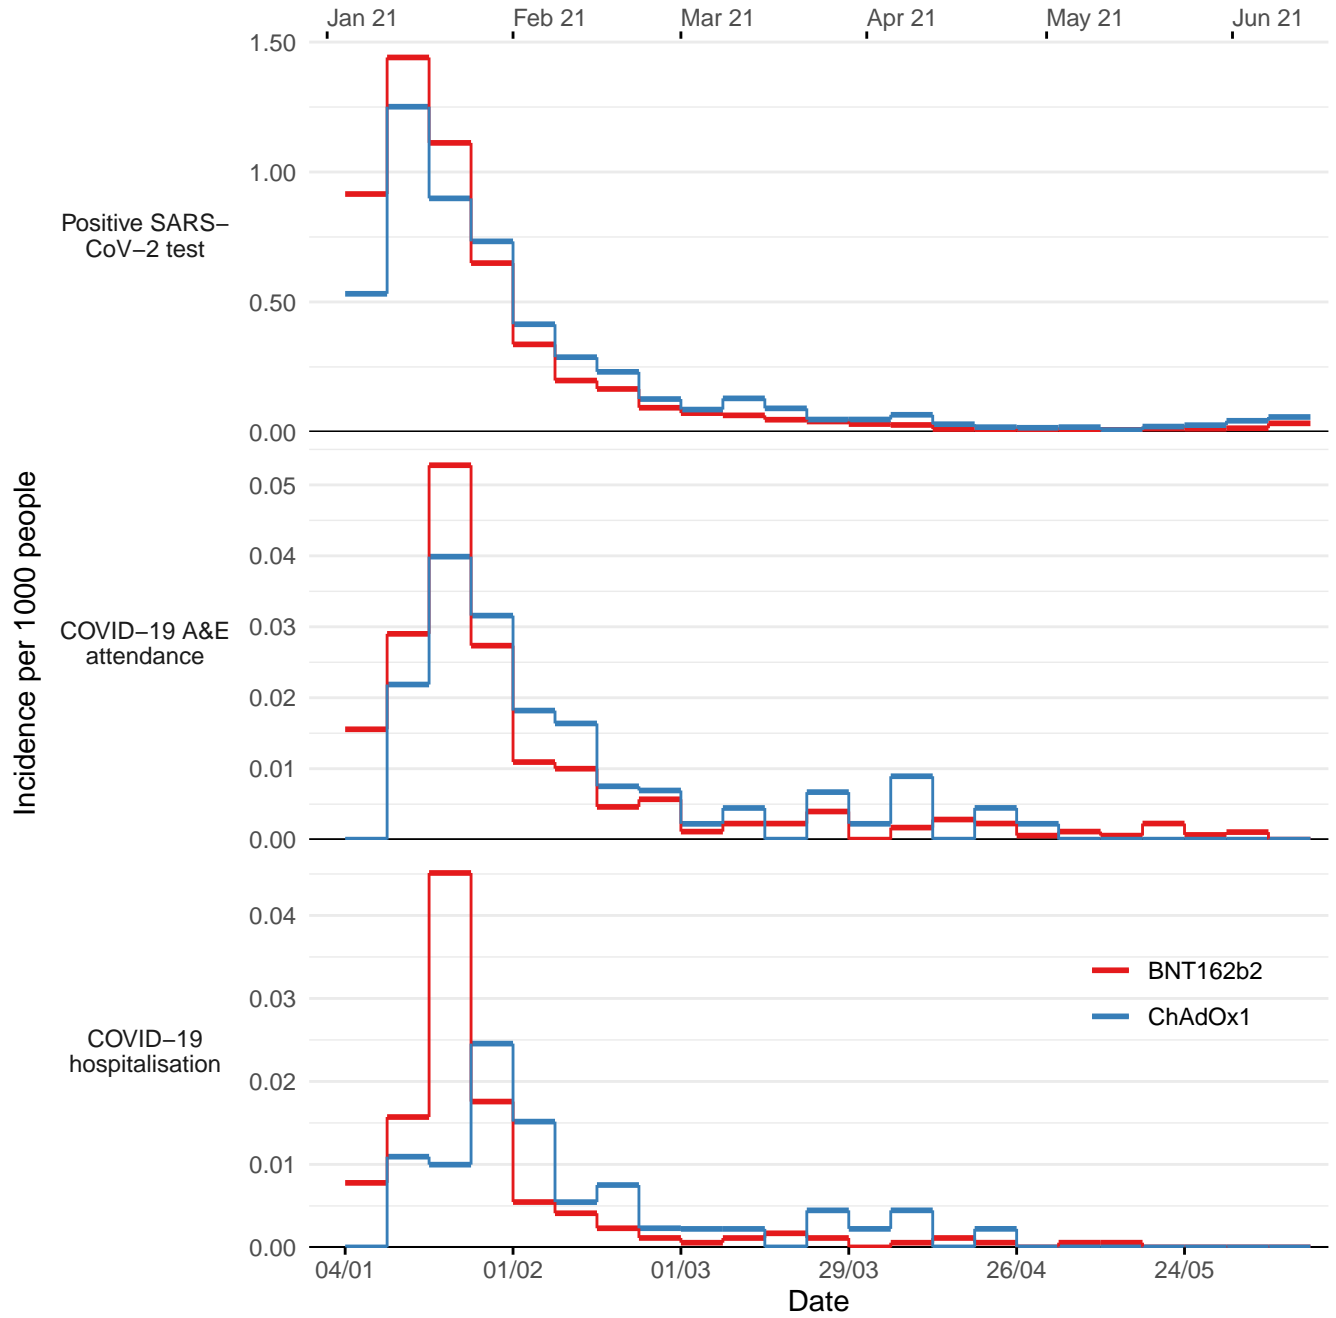

**Table S1: Inclusion criteria**

| Participants                                                           | N       | N excluded | % remaining |
|------------------------------------------------------------------------|---------|------------|-------------|
| HCWs aged 18-64 receiving BNT162b2 or ChAdOx1 between 4 Jan and 28 Feb | 361,287 | -          | 100.0%      |
| with no missing demographic information                                | 327,254 | 34,033     | 90.6%       |
| who are not clinically extremely vulnerable                            | 317,341 | 9,913      | 87.8%       |

**Table S2: Baseline characteristics before eligibility exclusions**

Characteristics for all HCWs aged 18-64 receiving a first dose of BNT162b2 or ChAdOx1 between 4 January and 28 February 2021 and actively registered at at TPP practice are reported, before exclusions due to missing demographic characteristics and Clinically Extremely Vulnerable status.

| Characteristic                         | BNT162b2      | ChAdOx1      |
|----------------------------------------|---------------|--------------|
| Total N                                | 286,559       | 74,728       |
| Age                                    |               |              |
| 18-30                                  | 47,700 (17%)  | 12,462 (17%) |
| 30s                                    | 66,352 (23%)  | 16,769 (22%) |
| 40s                                    | 72,266 (25%)  | 18,777 (25%) |
| 50s                                    | 77,047 (27%)  | 20,481 (27%) |
| 60-64                                  | 23,194 (8.1%) | 6,239 (8.3%) |
| Sex                                    |               |              |
| Female                                 | 225,335 (79%) | 57,290 (77%) |
| Male                                   | [REDACTED]    | [REDACTED]   |
| Unknown                                | [REDACTED]    | [REDACTED]   |
| Ethnicity                              |               |              |
| White                                  | 223,555 (83%) | 58,810 (84%) |
| Black                                  | 9,381 (3.5%)  | 3,707 (5.3%) |
| South Asian                            | 24,549 (9.2%) | 5,188 (7.4%) |
| Mixed                                  | 4,123 (1.5%)  | 1,145 (1.6%) |
| Other                                  | 6,532 (2.4%)  | 1,147 (1.6%) |
| Unknown                                | 18,419        | 4,731        |
| IMD                                    |               |              |
| 1 most deprived                        | 40,175 (14%)  | 11,653 (16%) |
| 2                                      | 51,761 (19%)  | 13,652 (19%) |
| 3                                      | 61,325 (22%)  | 15,420 (21%) |
| 4                                      | 63,102 (23%)  | 16,116 (22%) |
| 5 least deprived                       | 61,237 (22%)  | 15,362 (21%) |
| Unknown                                | 8,959         | 2,525        |
| Region                                 |               |              |
| North East and Yorkshire               | 60,707 (21%)  | 19,091 (26%) |
| East of England                        | 70,597 (25%)  | 14,081 (19%) |
| Midlands                               | 56,664 (20%)  | 19,752 (26%) |
| South West                             | 41,161 (14%)  | 5,981 (8.0%) |
| London                                 | 11,672 (4.1%) | 2,502 (3.3%) |
| North West                             | 26,570 (9.3%) | 9,030 (12%)  |
| South East                             | 19,088 (6.7%) | 4,268 (5.7%) |
| Unknown                                | 100           | 23           |
| Rural/urban category                   |               |              |
| Urban conurbation                      | 67,119 (24%)  | 21,439 (30%) |
| Urban city or town                     | 158,696 (57%) | 36,582 (51%) |
| Rural town or village                  | 51,879 (19%)  | 14,204 (20%) |
| Unknown                                | 8,865         | 2,503        |
| Vaccination day (from 4 January 2021)  | 12 (7, 19)    | 20 (13, 34)  |
| Body Mass Index > 40 kg/m <sup>2</sup> | 11,102 (3.9%) | 3,421 (4.6%) |
| Chronic heart disease                  | 10,485 (3.7%) | 3,055 (4.1%) |
| Chronic kidney disease                 | 2,517 (0.9%)  | 806 (1.1%)   |
| Diabetes                               | 14,798 (5.2%) | 4,490 (6.0%) |
| Chronic liver disease                  | 4,426 (1.5%)  | 1,416 (1.9%) |
| Chronic respiratory disease            | 3,635 (1.3%)  | 1,266 (1.7%) |



|                                                 |               |              |
|-------------------------------------------------|---------------|--------------|
| Chronic neurological disease                    | 6,863 (2.4%)  | 1,941 (2.6%) |
| Immunosuppressed                                | 4,465 (1.6%)  | 1,573 (2.1%) |
| Asplenia or poor spleen function                | 2,169 (0.8%)  | 654 (0.9%)   |
| Learning disabilities                           | 215 (<0.1%)   | 87 (0.1%)    |
| Serious mental illness                          | 1,397 (0.5%)  | 501 (0.7%)   |
| Morbidity count                                 |               |              |
| 0                                               | 235,874 (82%) | 59,642 (80%) |
| 1                                               | 42,344 (15%)  | 12,174 (16%) |
| 2+                                              | 8,341 (2.9%)  | 2,912 (3.9%) |
| Prior SARS-CoV-2 infection                      | 30,509 (11%)  | 10,486 (14%) |
| Number of SARS-CoV-2 tests in previous 3 months |               |              |
| 0                                               | 182,942 (64%) | 49,148 (66%) |
| 1-3                                             | 82,447 (29%)  | 21,857 (29%) |
| 4-6                                             | 11,988 (4.2%) | 2,099 (2.8%) |
| 7+                                              | 9,182 (3.2%)  | 1,624 (2.2%) |
| Clinically Extremely Vulnerable                 | 6,838 (2.4%)  | 3,578 (4.8%) |

---

**Table S3: Event rates**

| Days since first dose    | BNT162b2              |           | ChAdOx1               |           |
|--------------------------|-----------------------|-----------|-----------------------|-----------|
|                          | Events / person-years | Incidence | Events / person-years | Incidence |
| Positive SARS-CoV-2 test |                       |           |                       |           |
| 1-14                     | 21 / 103              | 0.204     | 16 / 72               | 0.221     |
| 15-28                    | 26 / 102              | 0.255     | 24 / 72               | 0.335     |
| 29-42                    | 14 / 101              | 0.138     | 8 / 71                | 0.113     |
| 43-70                    | 54 / 199              | 0.271     | 42 / 139              | 0.302     |
| 71-84                    | 29 / 98               | 0.296     | 14 / 68               | 0.205     |
| 85-98                    | 25 / 97               | 0.258     | 20 / 67               | 0.296     |
| 99-112                   | 24 / 94               | 0.255     | 17 / 66               | 0.259     |
| 113-126                  | 17 / 77               | 0.220     | 15 / 56               | 0.269     |
| 127-140                  | 14 / 54               | 0.258     | 14 / 41               | 0.345     |
| All                      | 224 / 926             | 0.242     | 170 / 652             | 0.261     |
| COVID-19 A&E attendance  |                       |           |                       |           |
| 1-14                     | - / 103               | -         | - / 73                | -         |
| 15-28                    | 0 / 103               | 0         | - / 72                | -         |
| 29-42                    | - / 103               | -         | 0 / 72                | 0         |
| 43-70                    | - / 206               | -         | - / 144               | -         |
| 71-84                    | - / 103               | -         | 0 / 72                | 0         |
| 85-98                    | 0 / 102               | 0         | 0 / 72                | 0         |
| 99-112                   | 0 / 100               | 0         | - / 70                | -         |
| 113-126                  | 0 / 83                | 0         | 0 / 60                | 0         |
| 127-140                  | - / 59                | -         | 0 / 44                | 0         |
| All                      | 7 / 964               | 0.007     | 8 / 679               | 0.012     |
| COVID-19 hospitalisation |                       |           |                       |           |
| 1-14                     | 7 / 103               | 0.068     | - / 73                | -         |
| 15-28                    | - / 103               | -         | 6 / 72                | 0.083     |
| 29-42                    | 6 / 103               | 0.058     | - / 72                | -         |
| 43-70                    | 7 / 204               | 0.034     | 12 / 143              | 0.084     |
| 71-84                    | 6 / 102               | 0.059     | 6 / 71                | 0.085     |
| 85-98                    | - / 102               | -         | - / 71                | -         |
| 99-112                   | 9 / 99                | 0.091     | - / 69                | -         |
| 113-126                  | - / 82                | -         | - / 59                | -         |
| 127-140                  | 6 / 58                | 0.103     | - / 43                | -         |
| All                      | 54 / 956              | 0.056     | 42 / 673              | 0.062     |
| COVID-19 death           |                       |           |                       |           |
| 1-14                     | - / 103               | -         | - / 73                | -         |
| 15-28                    | - / 103               | -         | 0 / 73                | 0         |
| 29-42                    | 0 / 103               | 0         | 0 / 72                | 0         |
| 43-70                    | 0 / 206               | 0         | - / 144               | -         |
| 71-84                    | 0 / 103               | 0         | 0 / 72                | 0         |
| 85-98                    | 0 / 103               | 0         | 0 / 72                | 0         |
| 99-112                   | 0 / 101               | 0         | 0 / 71                | 0         |
| 113-126                  | 0 / 84                | 0         | 0 / 60                | 0         |
| 127-140                  | 0 / 59                | 0         | - / 44                | -         |
| All                      | - / 965               | -         | - / 681               | -         |
| Second dose              |                       |           |                       |           |

|         |           |       |           |       |
|---------|-----------|-------|-----------|-------|
| 1-14    | 0 / 103   | 0     | 0 / 73    | 0     |
| 15-28   | 0 / 103   | 0     | 0 / 73    | 0     |
| 29-42   | 0 / 103   | 0     | 0 / 72    | 0     |
| 43-70   | 0 / 206   | 0     | 0 / 144   | 0     |
| 71-84   | 109 / 102 | 1.066 | 70 / 72   | 0.978 |
| 85-98   | 283 / 93  | 3.029 | 217 / 65  | 3.323 |
| 99-112  | 293 / 80  | 3.642 | 178 / 57  | 3.146 |
| 113-126 | 127 / 59  | 2.145 | 78 / 43   | 1.796 |
| 127-140 | 0 / 41    | 0     | 0 / 31    | 0     |
| All     | 812 / 893 | 0.910 | 543 / 630 | 0.862 |

**Table S4: Vaccine type for second doses**

| First dose | Matching second dose       | N       | %     |
|------------|----------------------------|---------|-------|
| BNT162b2   | no                         | 288     | 0.1%  |
| BNT162b2   | yes                        | 249,091 | 98.4% |
| BNT162b2   | no second dose at 20 weeks | 3,755   | 1.5%  |
| ChAdOx1    | no                         | 125     | 0.2%  |
| ChAdOx1    | yes                        | 62,463  | 97.3% |
| ChAdOx1    | no second dose at 20 weeks | 1,619   | 2.5%  |
